# Supplementary material for: How Hurricanes Drive Bird Displacement in Gulf Ecosystems Revealed by Deep Learning Species Distribution Model
Source: Research Square preprint supplement (doi:10.21203/rs.3.rs-8545614/v1), 2026-01-14
Supplement: Supplementary file 1 [file 1180e88d8e605666b918b7bf.docx]

**Appendix S3**

**How Hurricanes Drive Bird Displacement in Gulf Ecosystems Revealed by Deep Learning Species Distribution Model**

Liying Li

A full list of the data analyzed in this study is included below.

**eBird data**

The eBird data used to conduct this study are freely available on the eBird website at https://ebird.org/science/use-ebird-data. The data version used in this study was the eBird Reference Dataset from 2024

**Bird conservation status**

We use the bird conservation status presented in HBW / BirdLife Taxonomic Checklist v9 (current version) downloaded at <https://datazone.birdlife.org/userfiles/file/Species/Taxonomy/HBW-BirdLife_Checklist_v9_Oct24.zip>

**Air Temperature (Mean and Range)**

Ocean air temperature was acquired at https://www.bio-oracle.org/downloads-to-email.php

v.3.0 Assis, J., Fernández Bejarano, S.J., Salazar, V.W., Schepers, L., Gouvêa, L., Fragkopoulou, E., Leclercq, F., Vanhoorne, B., Tyberghein, L., Serrão, E.A., Verbruggen, H., De Clerck, O. (2024) Bio-ORACLE v3.0. Pushing marine data layers to the CMIP6 Earth system models of climate change research. Global Ecology and Biogeography. DOI: 10.1111/geb.13813

v.1.0 Tyberghein L, Verbruggen H, Pauly K, Troupin C, Mineur F, De Clerck O (2012) Bio-ORACLE: A global environmental dataset for marine species distribution modelling. Global Ecology and Biogeography, 21, 272–281. DOI: 10.1111/j.1466-8238.2011.00656.x

Land air temperature was acquired at https://www.worldclim.org/data/index.html

Citation: Fick, S.E. and R.J. Hijmans, 2017. WorldClim 2: new 1km spatial resolution climate surfaces for global land areas. [International Journal of Climatology 37 (12): 4302-4315](https://rmets.onlinelibrary.wiley.com/doi/abs/10.1002/joc.5086).

**Topography**

We retrieved information on elevation and topography (eastness and northness) from the following source(s):

Amatulli, G., S. Domisch, M.-N. Tuanmu, B. Parmentier, A. Ranipeta, J. Malczyk, and

W.Jetz. 2018. Data descriptor: A suite of global, cross-scale topographic variables for environmental and biodiversity modeling. Scientific Data 5:180040. <https://doi.org/10.1038/sdata.2018.40>

Data from Amatulli et al. (2018) available at <https://www.avl.class.noaa.gov/saa/products/search?sub_id=0&datatype_family=VIIRS_SDR&submit.x=21&submit.y=5>

**Chlorophyll Concentration**

The terrestrial leaf chlorophyll content for the year of 2020 was acquired from

Qian, X., Liu, L., Chen, X., Zhang, X., Chen, S., & Sun, Q. (2023). Global Leaf Chlorophyll Content Dataset (GLCC) from 2003–2012 to 2018–2020 Derived from MERIS and OLCI Satellite Data: Algorithm and Validation. *Remote Sensing*, *15*(3), 700. <https://doi.org/10.3390/rs15030700>

Accessed 12/04/2024 at <https://plus.figshare.com/articles/dataset/GLCC_global_leaf_chlorophyll_content_dataset_over_2003_2012_and_2018_2020_derived_from_MERIS_OLCI_satellite_data/20439351>

The ocean chlorophyll concentration was acquired from SUOMI-NPP VIIRS Level-3 Mapped Chlorophyll, Version 2022

NASA Goddard Space Flight Center, Ocean Ecology Laboratory, Ocean Biology Processing Group.
Visible and Infrared Imager/Radiometer Suite (VIIRS) SUOMI-NPP VIIRS Level-3 Mapped Chlorophyll; NASA OB.DAAC, Greenbelt, MD, USA. doi: 10.5067/SUOMI-NPP/VIIRS/L3M/CHL/2022.
Accessed on 12/2/2024 at https://oceancolor.gsfc.nasa.gov/l3/

**Land / Ocean Biomass Density Merge (9 km)**

GEDI L4B Gridded Aboveground Biomass Density, Version 2.1 (land)

Dubayah, R.O., J. Armston, S.P. Healey, Z. Yang, P.L. Patterson, S. Saarela, G. Stahl, L. Duncanson, J.R. Kellner, J. Bruening, and A. Pascual. 2023. GEDI L4B Gridded Aboveground Biomass Density, Version 2.1. ORNL DAAC, Oak Ridge, Tennessee, USA. <https://doi.org/10.3334/ORNLDAAC/2299>

Accessed at <https://daac.ornl.gov/cgi-bin/dsviewer.pl?ds_id=2299>

We used SUOMI-NPP VIIRS Level-3 Mapped Particulate Organic Carbon, Version 2022 for the Ocean biomass density approximation

NASA Goddard Space Flight Center, Ocean Ecology Laboratory, Ocean Biology Processing Group.
Visible and Infrared Imager/Radiometer Suite (VIIRS) SUOMI-NPP VIIRS Level-3 Mapped Particulate Organic Carbon Data; NASA OB.DAAC, Greenbelt, MD, USA. doi: 10.5067/SUOMI-NPP/VIIRS/L3M/POC/2022.
Accessed on 12/2/2024 at https://oceancolor.gsfc.nasa.gov/l3/

Mapped Particulate Organic Carbon (units of mg C / m3) was super imposed on the GEDI L4B Gridded Aboveground Biomass Density

**CCAP** L**and use and land cover information** at :

National Oceanic and Atmospheric Administration, Office for Coastal Management. “Name of Data Set.” Coastal Change Analysis Program (C-CAP) Regional Land Cover. Charleston, SC: NOAA Office for Coastal Management. https://coast.noaa.gov/digitalcoast/data/ccapregional.html

Data were downloaded from <https://coastalimagery.blob.core.windows.net/ccap-landcover/CCAP_bulk_download/Regional_30meter_Land_Cover/index.html>

**Avian habitat preference by breading seasons**

We retrieved information on species’ primary breeding and non-breading habitats from the following source(s):

Partners in Flight. 2021. Avian Conservation Assessment Database, version 2021. Available at [https://pif.birdconservancy.org/avian-conservation-assessment-database- scores/](https://pif.birdconservancy.org/avian-conservation-assessment-database-%2520scores/)

**Bathymetry Digital Elevation Models**

NOAA National Geophysical Data Center. 2010: Northern Gulf 1 arc-second MHW Coast Digital Elevation Model. NOAA National Centers for Environmental Information. Accessed September 2024 at <https://www.ncei.noaa.gov/access/metadata/landing-page/bin/iso?id=gov.noaa.ngdc.mgg.dem:731>

**Simulated Storm Surge**

Bilskie, Matthew V.; Hagen, Scott C.; Medeiros, Stephen; Kidwell, David; Buckel, Christine; Passeri, Davina; Alizad, Karim (2018). NCCOS Ecological Effects of Sea Level Rise in the Northern Gulf of Mexico (EESLR-NGOM): Simulated Storm Surge (NCEI Accession 0170339). [Maximum of the maximum]. NOAA National Centers for Environmental Information. Dataset. <https://doi.org/10.7289/v5fq9tvx>

Accessed at https://www.ncei.noaa.gov/access/metadata/landing-page/bin/iso?id=gov.noaa.nodc:0170339
