# Supplementary material for: How Hurricanes Drive Bird Displacement in Gulf Ecosystems Revealed by Deep Learning Species Distribution Model
Source: Research Square preprint supplement (doi:10.21203/rs.3.rs-8545614/v1), 2026-01-14
Supplement: Supplementary file 3 [file f6297fde26e1aa2f04c6d2ca.docx]

**Appendix S2**

**How Hurricanes Drive Bird Displacement in Gulf Ecosystems Revealed by Deep Learning Species Distribution Model**

# Table S1 Ecological Metrics Table

| Metric | Category | What It Measures | Interpretation / Notes | Function / Formula (Illustrative) |
| --- | --- | --- | --- | --- |
| Species Accuracy | Species-level | Accuracy of predicting species presence/absence | Proportion of correctly predicted presences and absences across all species | (TP + TN) / (TP + TN + FP + FN) (per species, then averaged) |
| Species Dissimilarity | Species-level | Dissimilarity between predicted and observed species occurrences | How different the predicted species presence/absence pattern is compared to true pattern (0 = perfect match) | 1 - |Pred ∩ Obs| / |Pred ∪ Obs| (Jaccard dissimilarity) |
| Species Calibration | Species-level | Calibration of species presence/absence predictions | How well predicted probabilities reflect true occurrence frequencies | Brier score or calibration curve slope |
| Species Precision | Species-level | Precision of species presence predictions | Of all species predicted present, how many are actually present (focus on false positives) | TP / (TP + FP) |
| Richness Accuracy | Richness-level | Accuracy of predicted species richness (total species count) | How close predicted species counts are to observed counts | 1 - |PredCount - ObsCount| / ObsCount or R² on counts |
| Richness Dissimilarity | Richness-level | Dissimilarity between predicted and observed species richness | Difference between predicted and observed species counts | |PredCount - ObsCount| or (PredCount - ObsCount)² |
| Richness Calibration | Richness-level | Calibration of predicted species richness | How well predicted richness values reflect actual richness | Calibration plot or correlation between predicted and observed richness |
| Richness Precision | Richness-level | Precision of richness predictions | Of predicted species richness, how many species are truly present (focus on false positives) | True Positives / Predicted Positives (based on species counts) |
| Community Accuracy  Sorensen | Community-level | Accuracy of community composition prediction using Sørensen index | Proportion of correct community presence/absence predictions based on Sørensen similarity | 2 * |Pred ∩ Obs| / (|Pred| + |Obs|) |
| Community  Dissimilarity  Sorenson | Community-level | Dissimilarity between predicted and observed communities using Sørensen index | How different predicted community is from observed (Sørensen dissimilarity) | 1 - Sørensen similarity |
| Community  Calibration  Sorenson | Community-level | Calibration of community predictions using Sørensen index | How well predicted community similarity matches observed similarity | Calibration curve or Brier score on Sørensen similarity |
| Community  Precision  Simpson Index | Community-level | Precision of community predictions using Simpson index | As above but with Simpson precision | Similar to Sørensen precision |

- **TP** — True Positive: predicted **presence**, observed **presence**
- **TN** — True Negative: predicted **absence**, observed **absence**
- **FP** — False Positive (Type I error): predicted **presence**, observed **absence**
- **FN** — False Negative (Type II error): predicted **absence**, observed **presence**
